# Supplementary material
Source: publisher site journal article supplement (https://www.spandidos-publications.com/5136/downloadSupplementary)

Figure S1. Cell densities of immunoreactive cells per mm<sup>2</sup> from COC1021 colon cancer tissue array. (A) HRASLS2, (B) UBE2N, (C) IMPDH1, (D) DYNC1LI1. QuPath (Version 0.3.0; <https://qupath.github.io>) was employed to produce the cell densities of immunoreactive cells per mm<sup>2</sup> for all target proteins. One-way analysis of variance was performed to compare the densities of positive signaling cells for immunohistochemical staining of target proteins and followed by the Bonferroni post hoc test. \*P<0.05 and \*\*\*\*P<0.0001. HRASLS2, phospholipase A and acyltransferase 2; UBE2N, ubiquitin-conjugating enzyme E2N; IMPDH1, inosine monophosphate dehydrogenase 1; DYNC1LI1, dynein, cytoplasmic 1 light intermediate chain 1. Normal/Benign, two normal colonic tissues, one congenital megacolon, and two adenomas; G1, well-differentiated CRC cells; G2, moderately differentiated CRC cells; G3, poorly differentiated CRC cells.

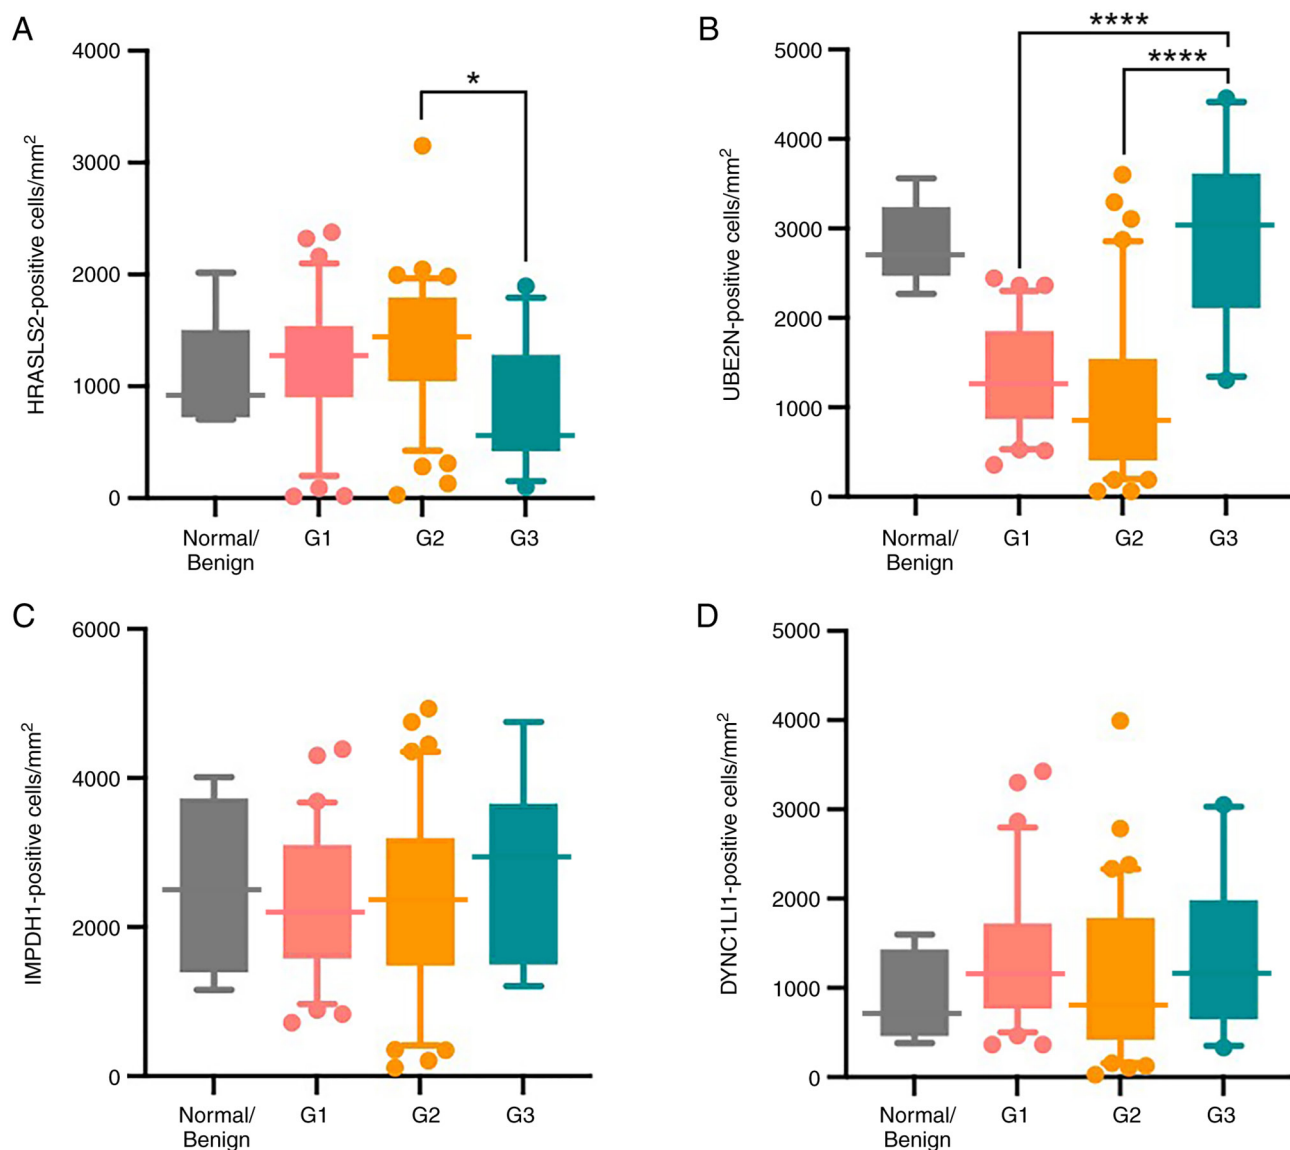

Supplement: Supplementary file 1 [file downloadSupplementary]
